# Supplementary material for: Decoding the Oncogenic Signals from the Long Non-Coding RNAs
Source: MDPI journal article supplement (doi:10.3390/onco1020014), 2021-12-10
Supplement: s1 [file s1]

## Supplementary Material

**Table S1.** Functional role of oncogenic lncRNAs in cancer.

| lncRNA    | Cancer                                                                                                            | Oncogenic Response                                                                                               | References |
|-----------|-------------------------------------------------------------------------------------------------------------------|------------------------------------------------------------------------------------------------------------------|------------|
| ANRIL     | CC, CRC, GBC, GC, HCC, NPC, NSCLC, OC, THCA                                                                       | Proliferation, Metastasis                                                                                        | [1,2]      |
| BANCR     | BC, CRC, ESCA, GC, HCC, LICA, MEL, NSCLC, OSCC, RB                                                                | Proliferation, Metastasis, EMT                                                                                   | [3]        |
| BCAR4     | BC, BLCA, CC, CSA, CRC, GC, GM, LICA, LC, PC                                                                      | Proliferation, Metastasis, Cell-survival                                                                         | [4]        |
| BGL3      | LMA                                                                                                               | Chromosome instability                                                                                           | [5]        |
| BLACAT1   | OC                                                                                                                | Proliferation, Therapy resistance                                                                                | [6]        |
| CCAT1     | AML, BC, CC, CCA, CRC, ESCA, GBC, GC, GO, HCC, LC, LSCC, MEL, MM, NPC, NSCLC, OC, OS, OSCC, PACA, PC, RB, RCC, TC | Proliferation, Metastasis, EMT, Therapy-resistance, Cell-survival                                                | [7]        |
| CCAT1-L   | CRC, GC                                                                                                           | Proliferation, Metastasis, EMT                                                                                   | [8,9]      |
| CCAT2     | BC, BLCA, CC, CCA, CRC, EC, ESCA, GC, GM, HCC, LC, NSCLC, OC, OS, OSCC, PA, PC, RCC                               | Proliferation, Metastasis, EMT Chromosome instability                                                            | [10]       |
| CHOP      | LICA                                                                                                              | Immune surveillance                                                                                              | [11]       |
| COMET     | CRC, NSCLC, RCC, THCA                                                                                             | Proliferation, Metastasis, Therapy-resistance, Cell-survival                                                     | [12-15]    |
| CUPID1/2  | BC                                                                                                                | Chromosome instability                                                                                           | [16]       |
| DANCR     | HCC, OC                                                                                                           | Proliferation, Cell survival, Metastasis, Stemness                                                               | [17,18]    |
| DDSR1     | NSCLC                                                                                                             | Therapy-resistance                                                                                               | [19]       |
| DICER-AS1 | OS                                                                                                                | Therapy-resistance                                                                                               | [20]       |
| DLEU1     | GM                                                                                                                | Therapy-resistance                                                                                               | [21]       |
| DLEU2     | CLL                                                                                                               | Immune surveillance                                                                                              | [22]       |
| FARSA-AS1 | CRC                                                                                                               | Cell-survival, Proliferation, EMT, Metastasis, Stemness                                                          | [23]       |
| FAS-AS1   | LYMA                                                                                                              | Immune surveillance                                                                                              | [24]       |
| FEZF1-AS1 | CRC                                                                                                               | Metabolic reprogramming                                                                                          | [25]       |
| GLCC1     | CRC                                                                                                               | Metabolic reprogramming                                                                                          | [26]       |
| Ginir     | MN                                                                                                                | Chromosome instability                                                                                           | [27]       |
| GUARDIN   | BC, CRC                                                                                                           | Chromosome instability, Proliferation, Cell-survival, Therapy-resistance                                         | [28,29]    |
| H19       | BC, BLCA, CCA, CRC, EC, ESCA, GBC, GC, HCC, LC, LMA, LSCC, LYMA, MEL, MM, NPC, NSCLC, OC, OS, PACA, RCC, TC       | Cell-survival, Proliferation, EMT, Metastasis, Metabolism, Stemness                                              | [30]       |
| HOTAIR    | BC, BLCA, CC, CRC, EC, ESCA, GC, GO, LC, LICA, NSCLC, OC, OS, PC, PACA,                                           | Cell-survival, Proliferation, EMT, Metastasis, Therapy-resistance.                                               | [31]       |
| HOTTIP    | AML, BC, CRC, ESCA, GC, GM, HCC, HNSCC, LC, NPC, NSCLC, OC, OS, OSCC, PACA, PC, RCC, THCA                         | Cell survival, Proliferation, EMT, Metastasis, Immune surveillance, Metabolic-reprogramming, Therapy-resistance. | [32]       |
| HOXA11-AS | BC, CC, CRC, ESCC, GM, HCC, LSCC, NSCLC, OC, OS, RCC, UM                                                          | Cell survival, Proliferation, EMT, Metastasis, Angiogenesis, Therapy-resistance                                  | [33]       |
| HULC      | CRC, GC, HCC, OS, PACA                                                                                            | Proliferation, EMT, Metastasis, Angiogenesis, Metabolic-reprogramming                                            | [34]       |
| JADE      | BC                                                                                                                | Chromosome instability                                                                                           | [35]       |
| LAMP5-AS1 | MLL                                                                                                               | Stemness                                                                                                         | [36]       |
| LINC00152 | ESCA, GBC                                                                                                         | EMT, Metastasis, Therapy-resistance                                                                              | [37,38]    |
| LINC00337 | CRC                                                                                                               | Cell survival, Metastasis                                                                                        | [39]       |

|               |                                                                                                                          |                                                                                                                  |         |
|---------------|--------------------------------------------------------------------------------------------------------------------------|------------------------------------------------------------------------------------------------------------------|---------|
| LINC00460     | BLCA, CRC, ESCA, GC, LC, NPC, NSCLC, OC                                                                                  | Cell survival, Proliferation, EMT, Metastasis                                                                    | [40]    |
| LINC00665     | LC, NSCLC                                                                                                                | Metastasis, Therapy-resistance                                                                                   | [41,42] |
| LINC01410     | GC                                                                                                                       | Cell survival, Metastasis                                                                                        | [43]    |
| Linc-BM742401 | CLL                                                                                                                      | Immune surveillance                                                                                              | [44]    |
| Linc-NMR      | BC, HCC, LICA, LC                                                                                                        | Metabolic reprogramming                                                                                          | [45]    |
| Linc-ROR      | BC, PACA, ESCC                                                                                                           | Cell survival, Proliferation, EMT, Metastasis, Stemness                                                          | [46-48] |
| LINK-A        | BC                                                                                                                       | Metabolic reprogramming                                                                                          | [49]    |
| LINP1         | CC                                                                                                                       | Chromosomal instability                                                                                          | [50]    |
| Lnc-ARSR      | RCC                                                                                                                      | Stemness, Metabolic reprogramming                                                                                | [51]    |
| Lnc-ATB       | BC, BLCA, CC, CCA, CRC, GC, GM, HCC, LC, OS, PACA, PC, RCC, THCA                                                         | Cell survival, Proliferation, EMT, Metastasis                                                                    | [52]    |
| Lnc-Cox2      | HCC                                                                                                                      | Immune surveillance                                                                                              | [53]    |
| Lnc-EGFR      | HCC                                                                                                                      | Immune surveillance                                                                                              | [54]    |
| Lnc-GATA6     | IC                                                                                                                       | Stemness                                                                                                         | [55]    |
| Lnc-Hh        | BC                                                                                                                       | Stemness                                                                                                         | [56]    |
| Lnc-SOX4      | LICA                                                                                                                     | Stemness                                                                                                         | [57]    |
| Lnc-TIM3      | HCC                                                                                                                      | Immune surveillance                                                                                              | [58]    |
| LNMAT1        | BLCA                                                                                                                     | Immune surveillance                                                                                              | [59]    |
| MALAT1        | BC, CRC, EC, GBC, GC, GM, HCC, NPC, NSCLC, OC, PC, TSCC, MM, PACA, OS,                                                   | Cell survival, Proliferation, EMT, Metastasis, Immune surveillance, Metabolic-reprogramming, Therapy-resistance. | [60]    |
| MEG3          | BC, CC, CRC, GC, GM, LICA, OC, OS, NSCLC                                                                                 | Cell survival, Proliferation, EMT, Metastasis                                                                    | [61]    |
| MIAT          | CLL                                                                                                                      | Immune surveillance                                                                                              | [62]    |
| MINCR         | CRC, GBC, GM, HCC, LICA, NPC, NSCLC, OSCC, LYMA                                                                          | Proliferation, EMT, Metastasis                                                                                   | [63-66] |
| MVIH          | HCC                                                                                                                      | Cell survival, Metastasis                                                                                        | [67]    |
| NBAT1         | BC, BLCA, GC, GBM, LC, NB, NSCLC, OC, OS, RCC                                                                            | Proliferation, EMT, Metastasis                                                                                   | [68-70] |
| NEAT1         | AML, BC, BLCA, CC, CRC, EC, ESCA, GC, GM, HCC, HMA, LMA, LSCC, LYMA, MM, NB, NPC, NSCLC, OC, OS, OSCC, PC, RB, RCC, THCA | Cell survival, Proliferation, EMT, Metastasis, Therapy-resistance                                                | [71]    |
| NKILA         | BC, LC                                                                                                                   | Immune surveillance                                                                                              | [72]    |
| NORAD         | BC, BLCA, CC, CRC, EC, ESCA, GC, GM, HCC, LC, MM, NB, NSCLC, OC, OS, OSCC, PC, PACA, RCC, THCA                           | Cell survival, Proliferation, EMT, Metastasis, Therapy-resistance                                                | [10]    |
| OIP5-AS1      | OS                                                                                                                       | Therapy-resistance                                                                                               | [73]    |
| Olfr29-ps-1   | MN                                                                                                                       | Immune surveillance                                                                                              | [74]    |
| OR3A4         | HCC                                                                                                                      | Cell survival, Metastasis                                                                                        | [75]    |
| PANDA         | OS                                                                                                                       | Chromosomal instability                                                                                          | [76]    |
| PCAT1         | AML, BLCA, CC, CRC, EC, ESCA, GC, GM, HCC, HNSCC, LC, LSCC, MM, NSCLC, OC, PACA, PC, OS                                  | Cell survival, Proliferation, EMT, Metastasis, Therapy-resistance                                                | [77]    |
| PCAT19        | GM, LSCC, NSCLC, PC                                                                                                      | Cell survival, Proliferation, EMT, Metastasis                                                                    | [78-81] |
| PCGEM1        | HCC                                                                                                                      | Therapy-resistance, Metabolic reprogramming                                                                      | [82]    |
| POU3F3        | GM                                                                                                                       | Cell survival, Metastasis                                                                                        | [83]    |
| PRLH1         | HCC                                                                                                                      | Chromosomal instability                                                                                          | [84]    |
| PVT1          | BC, BLCA, CC, CRC, EC, ESCA, GC, GM, HCC, HNSCC, LC, MEL, NPC, NSCLC, OS, OC, PACA, PC, RCC, THCA                        | Cell survival, Proliferation, Metastasis, Angiogenesis, Therapy-resistance, Stemness,                            | [85,86] |
| REG1CP        | CRC                                                                                                                      | Cell Proliferation                                                                                               | [87]    |
| RUNXOR        | LC                                                                                                                       | Immune surveillance                                                                                              | [88]    |

|            |                                                                                         |                                                                                             |           |
|------------|-----------------------------------------------------------------------------------------|---------------------------------------------------------------------------------------------|-----------|
| SAMMSON    | GBM, GC, HCC, LICA, MEL, OSCC, THCA                                                     | Cell Proliferation, EMT, Metastasis                                                         | [89-94]   |
| SCAMP1     | OC                                                                                      | Cell survival, Metastasis                                                                   | [95]      |
| SchLAP1    | BC, BLCA, CC, GBM, NSCLC, PC                                                            | Cell Proliferation, Metastasis, Immune surveillance                                         | [96-99]   |
| SNHG1      | BC                                                                                      | Therapy-resistance, Immune surveillance                                                     | [100,101] |
| SNHG7      | BC                                                                                      | Therapy-resistance, Stemness                                                                | [102]     |
| SNHG14     | HCC                                                                                     | Cell survival, Metastasis                                                                   | [103]     |
| SNHG20     | ESCC                                                                                    | Cell survival, Metastasis, Immune surveillance                                              | [104]     |
| SNHG3      | AML, BC, BLCA, CRC, GC, GM, HCC, LC, LSCC, OC, OS, OSCC, PC, RCC, THCA                  | Cell survival, Proliferation, EMT, Metastasis, Therapy resistance                           | [105]     |
| SOX2-OT    | NSCLC                                                                                   | Therapy-resistance                                                                          | [106]     |
| STEAP3-AS1 | CRC, HCC, GBM, TSCC                                                                     | Cell proliferation, Metastasis                                                              | [107-110] |
| TRPM2-AS   | NSCLC                                                                                   | Therapy-resistance                                                                          | [111]     |
| TTN-AS1    | HCC                                                                                     | Therapy-resistance                                                                          | [112]     |
| TUG1       | AML, BC, BLCA, CC, CCA, ESCA, GC, GM, HCC, LSCC, MM, NSCLC, OC, OS, OSCC, PACA, PC, RCC | Cell survival, Proliferation, EMT, Metastasis, Angiogenesis, Therapy-resistance             | [113]     |
| UCA1       | AML, BC, BLCA, CCA, CRC, GC, GM, HCC, HMA, HNSCC, MEL, MM, OS, RCC, THCA, TSCC          | Cell survival, Proliferation, EMT, Metastasis, Metabolic-reprogramming, Therapy-resistance. | [114]     |
| UFC1       | BC, CC, CRC, GC, HCC, NSCLC, PACA                                                       | Cell survival, Proliferation, EMT, Metastasis,                                              | [115-120] |
| VELUCT     | LC                                                                                      | Cell survival, Proliferation                                                                | [121]     |

Abbreviations: AML, Acute myeloid leukemia; BC, Breast cancer; BLCA, Bladder cancer; CC, Cervical cancer; CCA, Cholangiocarcinoma; CRC, Colorectal cancer; CSA: Chondrosarcoma; EC: Endometrial cancer; EMT, Epithelial-mesenchymal transition; ESCA: Esophageal carcinoma; ESCC, Esophageal squamous cell carcinoma; GC: Gastric cancer; GBC: Gall bladder cancer; GBM: Glioblastoma; GM: Glioma; HCC: Hepatocellular carcinoma; HMA, Hemangioma; HNSCC: Head and neck squamous cell carcinoma; IC: Intestinal cancers; LC: Lung cancers; LICA: Liver cancer; LMA, Leukemia; LSCC: Laryngeal squamous cell carcinoma; LYMA, Lymphoma; MM: Multiple myeloma; MN: Melanoma; NSCLC: Non-small cell lung carcinoma; NPC: Nasopharyngeal carcinoma; NB: Neuroblastoma; OC: Ovarian cancer; OSCC: Oral squamous cell carcinoma; OS: Osteosarcoma; PA, Pituitary adenoma; PACA: Pancreatic cancer; PC: Prostate cancers; RB: retinoblastoma; RCC: Renal cell carcinoma; THCA, Thyroid carcinoma; TC: Testicular cancer; TSCC: Tongue squamous cell carcinoma; UM-Uveal melanoma.

**Table S2.** Functional role of tumor-suppressor lncRNAs in cancer.

| <b>lncRNA</b> | <b>Cancer</b>                                                               | <b>Targeted Response</b>                                     | <b>References</b> |
|---------------|-----------------------------------------------------------------------------|--------------------------------------------------------------|-------------------|
| AB074169      | THCA                                                                        | Proliferation                                                | [122]             |
| AK126698      | NSCLC                                                                       | Proliferation, Cell survival, Metastasis, Therapy resistance | [123,124]         |
| BACE1-AS      | OC                                                                          | Proliferation, Metastasis                                    | [125]             |
| BANCR         | BLCA, CRC, LC, NSCLC, THCA                                                  | Proliferation, Cell survival, Metastasis                     | [3]               |
| CASC2c        | GBM                                                                         | Immune surveillance                                          | [126]             |
| DDSR1         | NSCLC                                                                       | Therapy-resistance                                           | [19]              |
| DILC          | LICA                                                                        | Stemness                                                     | [127]             |
| DINO          | CC                                                                          | Cell-survival                                                | [128]             |
| DIRC3         | MEL                                                                         | Proliferation, Metastasis                                    | [129]             |
| DLEU2L        | PACA                                                                        | Therapy-resistance                                           | [130]             |
| DRAIC         | CRC, GC, GM, PC                                                             | Proliferation, Metastasis                                    | [131-134]         |
| FER1L4        | OC                                                                          | Therapy-resistance                                           | [135]             |
| GAS5          | BC, BLCA, CC, CRC, EC, ESCA, GC, GM, HCC, MEL, NSCLC, OC, OS, PC, RCC, THCA | Proliferation, Cell survival, Metastasis, Therapy resistance | [136]             |
| H19           | CRC, HCC, OS                                                                | Proliferation                                                | [137-139]         |

|             |                                                                                                                |                                                                   |           |
|-------------|----------------------------------------------------------------------------------------------------------------|-------------------------------------------------------------------|-----------|
| Hand-AS1    | BC, CC, CML, CRC, EC, ESCA, GC, HCC, MEL, NB, NSCLC, OC, OS, PC,                                               | Proliferation, Cell survival, Metastasis, Therapy resistance      | [140]     |
| HITT        | CC, CRC, RCC                                                                                                   | Angiogenesis                                                      | [141]     |
| HOXB-AS3    | CRC                                                                                                            | Metabolic reprogramming                                           | [142]     |
| LBCS        | BLCA                                                                                                           | Stemness, Therapy-resistance                                      | [143]     |
| LINC00261   | BC, CCA, CRC, GC, HCC, LC, LSCC, PACA, PC                                                                      | Proliferation, Cell survival, EMT, Metastasis, Therapy-resistance | [144]     |
| LINC00908   | BC, PC                                                                                                         | Proliferation, Cell survival, Metastasis, Angiogenesis            | [145,146] |
| LINC00968   | BC                                                                                                             | Therapy resistance                                                | [147]     |
| lincRNA-p21 | CLL, CRC, GC, HCC, HNSCC, LYMA, MEL, NSCLC, PC                                                                 | Proliferation, Cell survival, EMT, Metastasis, Angiogenesis       | [148]     |
| MEG3        | BC, BLCA, CC, CRC, EC, ESCA, GC, GBC, GM, LICA, LMA, LYMA, MM, NSCLC, NPC, OS, OSCC, PACA, PC, RB, THCA, TSCC, | Proliferation, Cell survival, Metastasis                          | [61]      |
| MALAT1      | BC, CC, CRC                                                                                                    | Proliferation, Metastasis                                         | [149,150] |
| NBAT1       | BC, BLCA, GC, GBM, LC, NB, NSCLC, OC, OS, RCC                                                                  | Proliferation, EMT, Metastasis                                    | [68-70]   |
| NDRG2       | CRC                                                                                                            | Metabolic reprogramming                                           | [151]     |
| NEAT1       | CRC, PACA                                                                                                      | Proliferation                                                     | [152-154] |
| PTENP1      | BC, BLCA, CRC, EC, GC, GM, HCC, HNSCC, PC, RCC                                                                 | Proliferation, Cell survival, Metastasis                          | [155]     |
| PVT1        | LC                                                                                                             | Proliferation                                                     | [156]     |
| SATB2-AS1   | CRC                                                                                                            | Proliferation, Metastasis, Immune surveillance                    | [157,158] |
| TERRA       | HNSCC                                                                                                          | Cell survival                                                     | [159]     |

Abbreviations: BC, Breast cancers; BLCA, Bladder cancers; CC, Cervical cancers; CCA, Cholangiocarcinoma, CLL, Chronic lymphocytic leukemia; CRC, Colorectal cancers; EC, Endometrial cancers; EMT, Epithelial-mesenchymal transition; ESCA, Esophageal cancers; GC, Gastric cancers; GBC, Gall bladder cancers; GBM: Glioblastoma Multiforme; GM: Glioma; HCC: Hepatocellular carcinoma; HNSCC: Head and neck squamous cell carcinoma; LMA, leukemia, LICA: Liver cancers; LC: Lung cancers; LSCC: Laryngeal squamous cell carcinoma; LYMA, Lymphoma; MM: Multiple myeloma; NSCLC: Non-small cell lung carcinoma; NPC: Nasopharyngeal carcinoma; NB: Neuroblastoma; OSCC: Oral squamous cell carcinoma; OS: Osteosarcoma; PC: Prostate cancers; PACA: Pancreatic cancers; RB: retinoblastoma; RCC: Renal cell carcinoma; THCA: Thyroid cancers; TSCC: Tongue squamous cell carcinoma.

## References

- Wang: H.; Liu, Y.; Zhong, J.; Wu, C.; Zhong, Y.; Yang, G.; Zhang, J.; Tang, A. Long noncoding RNA ANRIL as a novel biomarker of lymph node metastasis and prognosis in human cancer: A meta-analysis. *Oncotarget* **2017**, *9*, 14608–14618, doi:10.18632/oncotarget.21825.
- Lou, N.; Liu, G.; Pan, Y. Long noncoding RNA ANRIL as a novel biomarker in human cancer. *Future Oncology* **2020**, *16*, 2981–2995, doi:10.2217/fon-2020-0470.
- Hussen, B.M.; Azimi, T.; Abak, A.; Hidayat, H.J.; Taheri, M.; Ghafouri-Fard, S. Role of lncRNA BANCR in Human Cancers: An Updated Review. *Frontiers in cell and developmental biology* **2021**, *9*, 689992–689992, doi:10.3389/fcell.2021.689992.
- Bei, W.; Wen, X.; Yuxuan, C.; Kai, L.; Jiacheng, W.; Chong, G.; Chengfu, Y. The Functional Role of Oncogenic lncRNA BCAR4 for Cancer Outcome. *Current Pharmaceutical Design* **2021**, *27*, 4107–4113, doi:http://dx.doi.org/10.2174/1381612827666210604114955.
- Hu, Z.; Mi, S.; Zhao, T.; Peng, C.; Peng, Y.; Chen, L.; Zhu, W.; Yao, Y.; Song, Q.; Li, X.; et al. BGL3 lncRNA mediates retention of the BRCA1/BARD1 complex at DNA damage sites. *The EMBO journal* **2020**, *39*, e104133, doi:10.15252/embj.2019104133.
- Shu, D.; Xu, Y.; Chen, W. Knockdown of lncRNA BLACAT1 reverses the resistance of afatinib to non-small cell lung cancer via modulating STAT3 signalling. *Journal of Drug Targeting* **2020**, *28*, 300–306, doi:10.1080/1061186X.2019.1650368.
- Ghafouri-Fard, S.; Taheri, M. Colon Cancer-Associated Transcripts 1 and 2: Roles and functions in human cancers. *Journal of Cellular Physiology* **2019**, *234*, 14581–14600, doi:https://doi.org/10.1002/jcp.28176.
- Fang, H.; Liu, H.M.; Wu, W.H.; Liu, H.; Pan, Y.; Li, W.J. Upregulation of long noncoding RNA CCAT1-L promotes epithelial-mesenchymal transition in gastric adenocarcinoma. *OncoTargets and therapy* **2018**, *11*, 5647–5655, doi:10.2147/ott.s170553.

9. Xiang, J.F.; Yin, Q.F.; Chen, T.; Zhang, Y.; Zhang, X.O.; Wu, Z.; Zhang, S.; Wang, H.B.; Ge, J.; Lu, X.; et al. Human colorectal cancer-specific CCAT1-L lncRNA regulates long-range chromatin interactions at the MYC locus. *Cell research* **2014**, *24*, 513–531, doi:10.1038/cr.2014.35.
10. Ghafouri-Fard, S.; Azimi, T.; Hussien, B.M.; Abak, A.; Taheri, M.; Dilmaghani, N.A. Non-coding RNA Activated by DNA Damage: Review of Its Roles in the Carcinogenesis. *Frontiers in cell and developmental biology* **2021**, *9*, 714787–714787, doi:10.3389/fcell.2021.714787.
11. Gao, Y.; Wang, T.; Li, Y.; Zhang, Y.; Yang, R. Lnc-chop Promotes Immunosuppressive Function of Myeloid-Derived Suppressor Cells in Tumor and Inflammatory Environments. *Journal of immunology (Baltimore, Md. : 1950)* **2018**, *200*, 2603–2614, doi:10.4049/jimmunol.1701721.
12. Chen, H.; Pan, Y.; Jin, X.; Chen, G. Identification of a Four Hypoxia-Associated Long Non-Coding RNA Signature and Establishment of a Nomogram Predicting Prognosis of Clear Cell Renal Cell Carcinoma. *Frontiers in oncology* **2021**, *11*, 713346–713346, doi:10.3389/fonc.2021.713346.
13. Li, J.; Wei, L. Increased expression of LINC01510 predicts poor prognosis and promotes malignant progression in human non-small cell lung cancer. *Biomed. Pharmacother* **2019**, *109*, 519–529, doi:10.1016/j.biopha.2018.10.136.
14. Esposito, R.; Esposito, D.; Pallante, P.; Fusco, A.; Ciccociolla, A.; Costa, V. Oncogenic Properties of the Antisense lncRNA COMET in BRAF- and RET-Driven Papillary Thyroid Carcinomas. *Cancer Res.* **2019**, *79*, 2124–2135, doi:10.1158/0008-5472.can-18-2520.
15. Cen, C.; Li, J.; Liu, J.; Yang, M.; Zhang, T.; Zuo, Y.; Lin, C.; Li, X. Long noncoding RNA LINC01510 promotes the growth of colorectal cancer cells by modulating MET expression. *Cancer cell international* **2018**, *18*, 45, doi:10.1186/s12935-018-0503-5.
16. Betts, J.A.; Moradi Marjaneh, M.; Al-Ejeh, F.; Lim, Y.C.; Shi, W.; Sivakumaran, H.; Tropée, R.; Patch, A.M.; Clark, M.B.; Bartonicek, N.; et al. Long Noncoding RNAs CUPID1 and CUPID2 Mediate Breast Cancer Risk at 11q13 by Modulating the Response to DNA Damage. *American journal of human genetics* **2017**, *101*, 255–266, doi:10.1016/j.ajhg.2017.07.007.
17. Yuan, S.X.; Wang, J.; Yang, F.; Tao, Q.F.; Zhang, J.; Wang, L.L.; Yang, Y.; Liu, H.; Wang, Z.G.; Xu, Q.G.; et al. Long noncoding RNA DANCR increases stemness features of hepatocellular carcinoma by derepression of CTNNB1. *Hepatology (Baltimore, Md.)* **2016**, *63*, 499–511, doi:10.1002/hep.27893.
18. Lin, X.; Yang, F.; Qi, X.; Li, Q.; Wang, D.; Yi, T.; Yin, R.; Zhao, X.; Zhong, X.; Bian, C. LncRNA DANCR promotes tumor growth and angiogenesis in ovarian cancer through direct targeting of miR-145. *Mol. Carcinog* **2019**, *58*, 2286–2296, doi:10.1002/mc.23117.
19. Sharma, V.; Khurana, S.; Kubben, N.; Abdelmohsen, K.; Oberdoerffer, P.; Gorospe, M.; Misteli, T. A BRCA1-interacting lncRNA regulates homologous recombination. *EMBO reports* **2015**, *16*, 1520–1534, doi:10.15252/embr.201540437.
20. Wang, F.; Kong, L.; Pu, Y.; Chao, F.; Zang, C.; Qin, W.; Zhao, F.; Cai, S. Long Noncoding RNA DICER1-AS1 Functions in Methylation Regulation on the Multi-Drugresistance of Osteosarcoma Cells via miR-34a-5p and GADD45A. *Front. Oncol* **2021**, *11*, 685881, doi:10.3389/fonc.2021.685881.
21. Lv, Q.L.; Wang, L.C.; Li, D.C.; Lin, Q.X.; Shen, X.L.; Liu, H.Y.; Li, M.; Ji, Y.L.; Qin, C.Z.; Chen, S.H. Knockdown lncRNA DLEU1 Inhibits Gliomas Progression and Promotes Temozolomide Chemosensitivity by Regulating Autophagy. *Front. Pharmacol* **2020**, *11*, 560543, doi:10.3389/fphar.2020.560543.
22. Klein, U.; Lia, M.; Crespo, M.; Siegel, R.; Shen, Q.; Mo, T.; Ambesi-Impimbato, A.; Califano, A.; Migliazza, A.; Bhagat, G.; et al. The DLEU2/miR-15a/16-1 cluster controls B cell proliferation and its deletion leads to chronic lymphocytic leukemia. *Cancer cell* **2010**, *17*, 28–40, doi:10.1016/j.ccr.2009.11.019.
23. Zhou, T.; Wu, L.; Ma, N.; Tang, F.; Yu, Z.; Jiang, Z.; Li, Y.; Zong, Z.; Hu, K. SOX9-activated FARSA-AS1 predetermines cell growth, stemness, and metastasis in colorectal cancer through upregulating FARSA and SOX9. *Cell death & disease* **2020**, *11*, 1071, doi:10.1038/s41419-020-03273-4.
24. Sehgal, L.; Mathur, R.; Braun, F.K.; Wise, J.F.; Berkova, Z.; Neelapu, S.; Kwak, L.W.; Samaniego, F. FAS-antisense 1 lncRNA and production of soluble versus membrane Fas in B-cell lymphoma. *Leukemia* **2014**, *28*, 2376–2387, doi:10.1038/leu.2014.126.
25. Bian, Z.; Zhang, J.; Li, M.; Feng, Y.; Wang, X.; Zhang, J.; Yao, S.; Jin, G.; Du, J.; Han, W.; et al. LncRNA-FEZF1-AS1 Promotes Tumor Proliferation and Metastasis in Colorectal Cancer by Regulating PKM2 Signaling. *Clin. Cancer Res.* **2018**, *24*, 4808–4819, doi:10.1158/1078-0432.ccr-17-2967.
26. Tang, J.; Yan, T.; Bao, Y.; Shen, C.; Yu, C.; Zhu, X.; Tian, X.; Guo, F.; Liang, Q.; Liu, Q.; et al. LncRNA GLCC1 promotes colorectal carcinogenesis and glucose metabolism by stabilizing c-Myc. *Nat. Commun* **2019**, *10*, 3499, doi:10.1038/s41467-019-11447-8.
27. Panda, S.; Setia, M.; Kaur, N.; Shepal, V.; Arora, V.; Singh, D.K.; Mondal, A.; Teli, A.; Tathode, M.; Gajula, R.; et al. Noncoding RNA Ginir functions as an oncogene by associating with centrosomal proteins. *PLoS biology* **2018**, *16*, e2004204, doi:10.1371/journal.pbio.2004204.
28. Sun, X.; Thorne, R.F.; Zhang, X.D.; He, M.; Li, J.; Feng, S.; Liu, X.; Wu, M. LncRNA GUARDIN suppresses cellular senescence through a LRP130-PGC1 $\alpha$ -FOXO4-p21-dependent signaling axis. *EMBO reports* **2020**, *21*, e48796, doi:10.15252/embr.201948796.
29. Hu, W.L.; Jin, L.; Xu, A.; Wang, Y.F.; Thorne, R.F.; Zhang, X.D.; Wu, M. GUARDIN is a p53-responsive long non-coding RNA that is essential for genomic stability. *Nat. Cell Biol* **2018**, *20*, 492–502, doi:10.1038/s41556-018-0066-7.
30. Yang, J.; Qi, M.; Fei, X.; Wang, X.; Wang, K. LncRNA H19: A novel oncogene in multiple cancers. *Int J. Biol Sci* **2021**, *17*, 3188–3208, doi:10.7150/ijbs.62573.
31. Xin, X.; Li, Q.; Fang, J.; Zhao, T. LncRNA HOTAIR: A Potential Prognostic Factor and Therapeutic Target in Human Cancers. *Frontiers in oncology* **2021**, *11*, 679244–679244, doi:10.3389/fonc.2021.679244.

32. Ghafouri-Fard, S.; Dashti, S.; Taheri, M. The HOTTIP (HOXA transcript at the distal tip) lncRNA: Review of oncogenic roles in human. *Biomed. Pharmacother* **2020**, *127*, 110158, doi:10.1016/j.biopha.2020.110158.
33. Wei, C.; Zhao, L.; Liang, H.; Zhen, Y.; Han, L. Recent advances in unraveling the molecular mechanisms and functions of HOXA11-AS in human cancers and other diseases (Review). *Oncol Rep.* **2020**, *43*, 1737–1754, doi:10.3892/or.2020.7552.
34. Yu, X.; Zheng, H.; Chan, M.T.V.; Wu, W.K.K. HULC: An oncogenic long non-coding RNA in human cancer. *Journal of cellular and molecular medicine* **2017**, *21*, 410–417, doi:10.1111/jcmm.12956.
35. Wan, G.; Hu, X.; Liu, Y.; Han, C.; Sood, A.K.; Calin, G.A.; Zhang, X.; Lu, X. A novel non-coding RNA lncRNA-JADE connects DNA damage signalling to histone H4 acetylation. *The EMBO journal* **2013**, *32*, 2833–2847, doi:10.1038/emboj.2013.221.
36. Wang, W.T.; Chen, T.Q.; Zeng, Z.C.; Pan, Q.; Huang, W.; Han, C.; Fang, K.; Sun, L.Y.; Yang, Q.Q.; Wang, D.; et al. The lncRNA LAMP5-AS1 drives leukemia cell stemness by directly modulating DOT1L methyltransferase activity in MLL leukemia. *Journal of hematology & oncology* **2020**, *13*, 78, doi:10.1186/s13045-020-00909-y.
37. Cai, Q.; Wang, Z.; Wang, S.; Weng, M.; Zhou, D.; Li, C.; Wang, J.; Chen, E.; Quan, Z. Long non-coding RNA LINC00152 promotes gallbladder cancer metastasis and epithelial-mesenchymal transition by regulating HIF-1 $\alpha$  via miR-138. *Open biology* **2017**, *7*, doi:10.1098/rsob.160247.
38. Zhang, S.; Liao, W.; Wu, Q.; Huang, X.; Pan, Z.; Chen, W.; Gu, S.; Huang, Z.; Wang, Y.; Tang, X.; et al. LINC00152 upregulates ZEB1 expression and enhances epithelial-mesenchymal transition and oxaliplatin resistance in esophageal cancer by interacting with EZH2. *Cancer cell international* **2020**, *20*, 569, doi:10.1186/s12935-020-01620-1.
39. Xu, X.; Nie, J.; Lu, L.; Du, C.; Meng, F.; Song, D. LINC00337 promotes tumor angiogenesis in colorectal cancer by recruiting DNMT1, which suppresses the expression of CNN1. *Cancer gene therapy* **2020**, doi:10.1038/s41417-020-00277-2.
40. Dai, C.; Zhang, Y.; Ni, H.; Kuang, Y.; Xu, Z. Prognostic significance of LINC00460 overexpression in solid tumours: A meta-analysis. *Postgraduate medical journal* **2020**, *96*, 286–295, doi:10.1136/postgradmedj-2019-137172.
41. Liu, X.; Lu, X.; Zhen, F.; Jin, S.; Yu, T.; Zhu, Q.; Wang, W.; Xu, K.; Yao, J.; Guo, R. LINC00665 Induces Acquired Resistance to Gefitinib through Recruiting EZH2 and Activating PI3K/AKT Pathway in NSCLC. *Molecular therapy. Nucleic acids* **2019**, *16*, 155–161, doi:10.1016/j.omtn.2019.02.010.
42. Cong, Z.; Diao, Y.; Li, X.; Jiang, Z.; Xu, Y.; Zhou, H.; Qiang, Y.; Wu, H.; Shen, Y. Long non-coding RNA linc00665 interacts with YB-1 and promotes angiogenesis in lung adenocarcinoma. *Biochemical and biophysical research communications* **2020**, *527*, 545–552, doi:10.1016/j.bbrc.2020.04.108.
43. Zhang, J.X.; Chen, Z.H.; Chen, D.L.; Tian, X.P.; Wang, C.Y.; Zhou, Z.W.; Gao, Y.; Xu, Y.; Chen, C.; Zheng, Z.S.; et al. LINC01410-miR-532-NCF2-NF- $\kappa$ B feedback loop promotes gastric cancer angiogenesis and metastasis. *Oncogene* **2018**, *37*, 2660–2675, doi:10.1038/s41388-018-0162-y.
44. Wang, L.; Wang, J.; Xiong, H.; Wu, F.; Lan, T.; Zhang, Y.; Guo, X.; Wang, H.; Saleem, M.; Jiang, C.; et al. Co-targeting hexokinase 2-mediated Warburg effect and ULK1-dependent autophagy suppresses tumor growth of PTEN- and TP53-deficiency-driven castration-resistant prostate cancer. *EBioMedicine* **2016**, *7*, 50–61, doi:10.1016/j.ebiom.2016.03.022.
45. Gandhi, M.; Groß, M.; Holler, J.M.; Coggins, S.A.; Patil, N.; Leupold, J.H.; Munschauer, M.; Schenone, M.; Hartigan, C.R.; Allgayer, H.; et al. The lncRNA lincNMR regulates nucleotide metabolism via a YBX1 - RRM2 axis in cancer. *Nat. Commun* **2020**, *11*, 3214, doi:10.1038/s41467-020-17007-9.
46. Chen, Y.M.; Liu, Y.; Wei, H.Y.; Lv, K.Z.; Fu, P. Linc-ROR induces epithelial-mesenchymal transition and contributes to drug resistance and invasion of breast cancer cells. *Tumour biology : The journal of the International Society for Oncodevelopmental Biology and Medicine* **2016**, *37*, 10861–10870, doi:10.1007/s13277-016-4909-1.
47. Zhan, H.X.; Wang, Y.; Li, C.; Xu, J.W.; Zhou, B.; Zhu, J.K.; Han, H.F.; Wang, L.; Wang, Y.S.; Hu, S.Y. LincRNA-ROR promotes invasion, metastasis and tumor growth in pancreatic cancer through activating ZEB1 pathway. *Cancer Lett* **2016**, *374*, 261–271, doi:10.1016/j.canlet.2016.02.018.
48. Gao, H.; Wang, T.; Zhang, P.; Shang, M.; Gao, Z.; Yang, F.; Liu, R. Linc-ROR regulates apoptosis in esophageal squamous cell carcinoma via modulation of p53 ubiquitination by targeting miR-204-5p/MDM2. *J. Cell Physiol* **2020**, *235*, 2325–2335, doi:10.1002/jcp.29139.
49. Lin, A.; Li, C.; Xing, Z.; Hu, Q.; Liang, K.; Han, L.; Wang, C.; Hawke, D.H.; Wang, S.; Zhang, Y.; et al. The LINK-A lncRNA activates normoxic HIF1 $\alpha$  signalling in triple-negative breast cancer. *Nat. Cell Biol* **2016**, *18*, 213–224, doi:10.1038/ncb3295.
50. Wang, X.; Liu, H.; Shi, L.; Yu, X.; Gu, Y.; Sun, X. LINP1 facilitates DNA damage repair through non-homologous end joining (NHEJ) pathway and subsequently decreases the sensitivity of cervical cancer cells to ionizing radiation. *Cell Cycle* **2018**, *17*, 439–447, doi:10.1080/15384101.2018.1442625.
51. Qu, L.; Wu, Z.; Li, Y.; Xu, Z.; Liu, B.; Liu, F.; Bao, Y.; Wu, D.; Liu, J.; Wang, A.; et al. A feed-forward loop between lncARSR and YAP activity promotes expansion of renal tumour-initiating cells. *Nat. Commun* **2016**, *7*, 12692, doi:10.1038/ncomms12692.
52. Tang, F.; Xu, Y.; Wang, H.; Bian, E.; Zhao, B. LncRNA-ATB in cancers: What do we know so far? *Mol. Biol Rep.* **2020**, *47*, 4077–4086, doi:10.1007/s11033-020-05415-5.
53. Ye, Y.; Xu, Y.; Lai, Y.; He, W.; Li, Y.; Wang, R.; Luo, X.; Chen, R.; Chen, T. Long non-coding RNA cox-2 prevents immune evasion and metastasis of hepatocellular carcinoma by altering M1/M2 macrophage polarization. *J. Cell Biochem* **2018**, *119*, 2951–2963, doi:10.1002/jcb.26509.
54. Jiang, R.; Tang, J.; Chen, Y.; Deng, L.; Ji, J.; Xie, Y.; Wang, K.; Jia, W.; Chu, W.M.; Sun, B. The long noncoding RNA lnc-EGFR stimulates T-regulatory cells differentiation thus promoting hepatocellular carcinoma immune evasion. *Nat. Commun* **2017**, *8*, 15129, doi:10.1038/ncomms15129.

55. Zhu, P.; Wu, J.; Wang, Y.; Zhu, X.; Lu, T.; Liu, B.; He, L.; Ye, B.; Wang, S.; Meng, S.; et al. LncGata6 maintains stemness of intestinal stem cells and promotes intestinal tumorigenesis. *Nat. Cell Biol* **2018**, *20*, 1134–1144, doi:10.1038/s41556-018-0194-0.
56. Zhou, M.; Hou, Y.; Yang, G.; Zhang, H.; Tu, G.; Du, Y.E.; Wen, S.; Xu, L.; Tang, X.; Tang, S.; et al. LncRNA-Hh Strengthen Cancer Stem Cells Generation in Twist-Positive Breast Cancer via Activation of Hedgehog Signaling Pathway. *Stem cells (Dayton, Ohio)* **2016**, *34*, 55–66, doi:10.1002/stem.2219.
57. Chen, Z.Z.; Huang, L.; Wu, Y.H.; Zhai, W.J.; Zhu, P.P.; Gao, Y.F. LncSox4 promotes the self-renewal of liver tumour-initiating cells through Stat3-mediated Sox4 expression. *Nat. Commun* **2016**, *7*, 12598, doi:10.1038/ncomms12598.
58. Ji, J.; Yin, Y.; Ju, H.; Xu, X.; Liu, W.; Fu, Q.; Hu, J.; Zhang, X.; Sun, B. Long non-coding RNA Lnc-Tim3 exacerbates CD8 T cell exhaustion via binding to Tim-3 and inducing nuclear translocation of Bat3 in HCC. *Cell Death Dis* **2018**, *9*, 478, doi:10.1038/s41419-018-0528-7.
59. Chen, C.; He, W.; Huang, J.; Wang, B.; Li, H.; Cai, Q.; Su, F.; Bi, J.; Liu, H.; Zhang, B.; et al. LNMAT1 promotes lymphatic metastasis of bladder cancer via CCL2 dependent macrophage recruitment. *Nat. Commun* **2018**, *9*, 3826, doi:10.1038/s41467-018-06152-x.
60. Goyal, B.; Yadav, S.R.M.; Awasthee, N.; Gupta, S.; Kunnumakkara, A.B.; Gupta, S.C. Diagnostic, prognostic, and therapeutic significance of long non-coding RNA MALAT1 in cancer. *Biochim Biophys Acta Rev. Cancer* **2021**, *1875*, 188502, doi:10.1016/j.bbcan.2021.188502.
61. Ghafouri-Fard, S.; Taheri, M. Maternally expressed gene 3 (MEG3): A tumor suppressor long non coding RNA. *Biomed. Pharmacother* **2019**, *118*, 109129, doi:10.1016/j.biopha.2019.109129.
62. Sattari, A.; Siddiqui, H.; Moshiri, F.; Nganheu, A.; Nakamura, T.; Kipps, T.J.; Croce, C.M. Upregulation of long noncoding RNA MIAT in aggressive form of chronic lymphocytic leukemias. *Oncotarget* **2016**, *7*, 54174–54182, doi:10.18632/oncotarget.11099.
63. Yu, Y.; Chang, Z.; Han, C.; Zhuang, L.; Zhou, C.; Qi, X.; Peng, Z. Long non-coding RNA MINCR aggravates colon cancer via regulating miR-708-5p-mediated Wnt/ $\beta$ -catenin pathway. *Biomed. Pharmacother* **2020**, *129*, 110292, doi:10.1016/j.biopha.2020.110292.
64. Li, H.; Yuan, R.; Wang, H.; Li, C.; Wei, J. LncRNA MINCR promotes the development of liver cancer by regulating microRNA-107/ $\beta$ -catenin. *Journal of B.U.ON. : Official journal of the Balkan Union of Oncology* **2020**, *25*, 972–980.
65. Li, Z.; Xie, X.; Fan, X.; Li, X. Long Non-coding RNA MINCR Regulates miR-876-5p/GSPT1 Axis to Aggravate Glioma Progression. *Neurochemical research* **2020**, *45*, 1690–1699, doi:10.1007/s11064-020-03029-8.
66. Zhong, Q.; Chen, Y.; Chen, Z. LncRNA MINCR regulates irradiation resistance in nasopharyngeal carcinoma cells via the microRNA-223/ZEB1 axis. *Cell Cycle* **2020**, *19*, 53–66, doi:10.1080/15384101.2019.1692176.
67. Yuan, S.X.; Yang, F.; Yang, Y.; Tao, Q.F.; Zhang, J.; Huang, G.; Yang, Y.; Wang, R.Y.; Yang, S.; Huo, X.S.; et al. Long noncoding RNA associated with microvascular invasion in hepatocellular carcinoma promotes angiogenesis and serves as a predictor for hepatocellular carcinoma patients' poor recurrence-free survival after hepatectomy. *Hepatology (Baltimore, Md.)* **2012**, *56*, 2231–2241, doi:10.1002/hep.25895.
68. Wang, D.L.; Yuan, P.; Tian, J.Y. Expression of long noncoding RNA NBAT1 is associated with the outcome of patients with non-small cell lung cancer. *Revista da Associacao Medica Brasileira (1992)* **2020**, *66*, 898–903, doi:10.1590/1806-9282.66.7.898.
69. Juvvuna, P.K.; Mondal, T.; Di Marco, M.; Kosalai, S.T.; Kanduri, M.; Kanduri, C. NBAT1/CASC15-003/USP36 control MYCN expression and its downstream pathway genes in neuroblastoma. *Neuro-oncology advances* **2021**, *3*, vdab056, doi:10.1093/no-ajnl/vdab056.
70. Wei, L.; Ling, M.; Yang, S.; Xie, Y.; Liu, C.; Yi, W. Long noncoding RNA NBAT1 suppresses hepatocellular carcinoma progression via competitively associating with IGF2BP1 and decreasing c-Myc expression. *Human cell* **2021**, *34*, 539–549, doi:10.1007/s13577-020-00464-1.
71. Li, K.; Yao, T.; Zhang, Y.; Li, W.; Wang, Z. NEAT1 as a competing endogenous RNA in tumorigenesis of various cancers: Role, mechanism and therapeutic potential. *Int J. Biol Sci* **2021**, *17*, 3428–3440, doi:10.7150/ijbs.62728.
72. Huang, D.; Chen, J.; Yang, L.; Ouyang, Q.; Li, J.; Lao, L.; Zhao, J.; Liu, J.; Lu, Y.; Xing, Y.; et al. NKILA lncRNA promotes tumor immune evasion by sensitizing T cells to activation-induced cell death. *Nature immunology* **2018**, *19*, 1112–1125, doi:10.1038/s41590-018-0207-y.
73. Song, L.; Zhou, Z.; Gan, Y.; Li, P.; Xu, Y.; Zhang, Z.; Luo, F.; Xu, J.; Zhou, Q.; Dai, F. Long noncoding RNA OIP5-AS1 causes cisplatin resistance in osteosarcoma through inducing the LPAAT $\beta$ /PI3K/AKT/mTOR signaling pathway by sponging the miR-340-5p. *J. Cell Biochem* **2019**, *120*, 9656–9666, doi:10.1002/jcb.28244.
74. Shang, W.; Gao, Y.; Tang, Z.; Zhang, Y.; Yang, R. The Pseudogene Olfr29-ps1 Promotes the Suppressive Function and Differentiation of Monocytic MDSCs. *Cancer immunology research* **2019**, *7*, 813–827, doi:10.1158/2326-6066.cir-18-0443.
75. Li, W.; Fu, Q.; Man, W.; Guo, H.; Yang, P. LncRNA OR3A4 participates in the angiogenesis of hepatocellular carcinoma through modulating AGGF1/akt/mTOR pathway. *European journal of pharmacology* **2019**, *849*, 106–114, doi:10.1016/j.ejphar.2019.01.049.
76. Hung, T.; Wang, Y.; Lin, M.F.; Koegel, A.K.; Kotake, Y.; Grant, G.D.; Horlings, H.M.; Shah, N.; Umbricht, C.; Wang, P.; et al. Extensive and coordinated transcription of noncoding RNAs within cell-cycle promoters. *Nat. Genet.* **2011**, *43*, 621–629, doi:10.1038/ng.848.
77. Ghafouri-Fard, S.; Dashti, S.; Taheri, M. PCAT1: An oncogenic lncRNA in diverse cancers and a putative therapeutic target. *Experimental and molecular pathology* **2020**, *114*, 104429, doi:10.1016/j.yexmp.2020.104429.

78. Xie, Y.H.; Hu, J. Suppression of long non-coding RNA PCAT19 inhibits glioma cell proliferation and invasion, and increases cell apoptosis through regulation of MELK targeted by miR-142-5p. *Genes & genomics* **2020**, *42*, 1299–1310, doi:10.1007/s13258-020-01003-w.
79. Zhang, X.; Wang, Q.; Xu, Y.; Wang, B.; Jia, C.; Wang, L.; Sun, H.; Zhao, H.; Wang, Z.; Zou, Q.; et al. lncRNA PCAT19 negatively regulates p53 in non-small cell lung cancer. *Oncology letters* **2019**, *18*, 6795–6800, doi:10.3892/ol.2019.11041.
80. Xu, S.; Guo, J.; Zhang, W. lncRNA PCAT19 promotes the proliferation of laryngocarcinoma cells via modulation of the miR-182/PDK4 axis. *J. Cell Biochem* **2019**, *120*, 12810–12821, doi:10.1002/jcb.28552.
81. Hua, J.T.; Ahmed, M.; Guo, H.; Zhang, Y.; Chen, S.; Soares, F.; Lu, J.; Zhou, S.; Wang, M.; Li, H.; et al. Risk SNP-Mediated Promoter-Enhancer Switching Drives Prostate Cancer through lncRNA PCAT19. *Cell* **2018**, *174*, 564–575.e518, doi:10.1016/j.cell.2018.06.014.
82. Chen, J.; Yuan, D.; Hao, Q.; Zhu, D.; Chen, Z. lncRNA PCGEM1 mediates oxaliplatin resistance in hepatocellular carcinoma via miR-129-5p/ETV1 axis in vitro. *Advances in clinical and experimental medicine : Official organ Wroclaw Medical University* **2021**, doi:10.17219/acem/135533.
83. Lang, H.L.; Hu, G.W.; Chen, Y.; Liu, Y.; Tu, W.; Lu, Y.M.; Wu, L.; Xu, G.H. Glioma cells promote angiogenesis through the release of exosomes containing long non-coding RNA POU3F3. *European review for medical and pharmacological sciences* **2017**, *21*, 959–972.
84. Deng, B.; Xu, W.; Wang, Z.; Liu, C.; Lin, P.; Li, B.; Huang, Q.; Yang, J.; Zhou, H.; Qu, L. An LTR retrotransposon-derived lncRNA interacts with RNF169 to promote homologous recombination. *EMBO reports* **2019**, *20*, e47650, doi:10.15252/embr.201847650.
85. Onagoruwa, O.T.; Pal, G.; Ochu, C.; Ogunwobi, O.O. Oncogenic Role of PVT1 and Therapeutic Implications. *Front. Oncol* **2020**, *10*, 17, doi:10.3389/fonc.2020.00017.
86. Li, M.-Y.; Tang, X.-H.; Fu, Y.; Wang, T.-J.; Zhu, J.-M. Regulatory Mechanisms and Clinical Applications of the Long Non-coding RNA PVT1 in Cancer Treatment. *Frontiers in oncology* **2019**, *9*, 787–787, doi:10.3389/fonc.2019.00787.
87. Yari, H.; Jin, L.; Teng, L.; Wang, Y.; Wu, Y.; Liu, G.Z.; Gao, W.; Liang, J.; Xi, Y.; Feng, Y.C.; et al. lncRNA REG1CP promotes tumorigenesis through an enhancer complex to recruit FANCD1 helicase for REG3A transcription. *Nature Communications* **2019**, *10*, 5334, doi:10.1038/s41467-019-13313-z.
88. Tian, X.; Ma, J.; Wang, T.; Tian, J.; Zheng, Y.; Peng, R.; Wang, Y.; Zhang, Y.; Mao, L.; Xu, H.; et al. Long non-coding RNA RUNXOR accelerates MDSC-mediated immunosuppression in lung cancer. *BMC Cancer* **2018**, *18*, 660, doi:10.1186/s12885-018-4564-6.
89. Chang, J.; Yang, B.; Zhou, Y.; Yin, C.; Liu, T.; Qian, H.; Xing, G.; Wang, S.; Li, F.; Zhang, Y.; et al. Acute Methylmercury Exposure and the Hypoxia-Inducible Factor-1 $\alpha$  Signaling Pathway under Normoxic Conditions in the Rat Brain and Astrocytes in Vitro. *Environ. Health Perspect* **2019**, *127*, 127006, doi:10.1289/EHP5139.
90. Zheng, X.; Tian, X.; Zhang, Q.; Shi, P.; Li, S. Long non-coding RNA SAMMSON as a novel potential diagnostic and prognostic biomarker for oral squamous cell carcinoma. *Journal of dental sciences* **2020**, *15*, 329–335, doi:10.1016/j.jds.2019.11.008.
91. Sun, S.B.; Lin, S.X.; Cao, H.L.; Xiao, Z.Q. Values of long noncoding RNA SAMMSON in the clinicopathologic features and the prognostic implications of human gastric cancer. *European review for medical and pharmacological sciences* **2020**, *24*, 6080–6087, doi:10.26355/eurev\_202006\_21503.
92. Shao, L.; Sun, W.; Wang, Z.; Dong, W.; Qin, Y. Long noncoding RNA SAMMSON promotes papillary thyroid carcinoma progression through p300/Sp1 axis and serves as a novel diagnostic and prognostic biomarker. *IUBMB life* **2020**, *72*, 237–246, doi:10.1002/iub.2158.
93. Han, S.; Yan, Y.; Ren, Y.; Hu, Y.; Wang, Y.; Chen, L.; Zhi, Z.; Zheng, Y.; Shao, Y.; Liu, J. lncRNA SAMMSON Mediates Adaptive Resistance to RAF Inhibition in BRAF-Mutant Melanoma Cells. *Cancer Res.* **2021**, *81*, 2918–2929, doi:10.1158/0008-5472.can-20-3145.
94. Ni, H.; Wang, K.; Xie, P.; Zuo, J.; Liu, W.; Liu, C. lncRNA SAMMSON Knockdown Inhibits the Malignancy of Glioblastoma Cells by Inactivation of the PI3K/Akt Pathway. *Cellular and molecular neurobiology* **2021**, *41*, 79–90, doi:10.1007/s10571-020-00833-2.
95. Song, R.; Liu, Z.; Lu, L.; Liu, F.; Zhang, B. Long Noncoding RNA SCAMP1 Targets miR-137/CXCL12 Axis to Boost Cell Invasion and Angiogenesis in Ovarian Cancer. *DNA and cell biology* **2020**, *39*, 1041–1050, doi:10.1089/dna.2019.5312.
96. Huang, K.; Tang, Y. SchLAP1 promotes prostate cancer development through interacting with EZH2 to mediate promoter methylation modification of multiple miRNAs of chromosome 5 with a DNMT3a-feedback loop. *Cell death & disease* **2021**, *12*, 188, doi:10.1038/s41419-021-03455-8.
97. Prensner, J.R.; Iyer, M.K.; Sahu, A.; Asangani, I.A.; Cao, Q.; Patel, L.; Vergara, I.A.; Davicioni, E.; Erho, N.; Ghadessi, M.; et al. The long noncoding RNA SchLAP1 promotes aggressive prostate cancer and antagonizes the SWI/SNF complex. *Nat. Genet.* **2013**, *45*, 1392–1398, doi:10.1038/ng.2771.
98. Prensner, J.R.; Zhao, S.; Erho, N.; Schipper, M.; Iyer, M.K.; Dhanasekaran, S.M.; Magi-Galluzzi, C.; Mehra, R.; Sahu, A.; Siddiqui, J.; et al. RNA biomarkers associated with metastatic progression in prostate cancer: A multi-institutional high-throughput analysis of SchLAP1. *The Lancet. Oncology* **2014**, *15*, 1469–1480, doi:10.1016/s1470-2045(14)71113-1.
99. Cheng, S.; Zhao, Q.; Zheng, Z. Expression and clinical significance of lncRNA-SchLAP1 in breast cancer. *Journal of B.U.ON. : Official journal of the Balkan Union of Oncology* **2021**, *26*, 728–733.
100. Shen, Y.; Liu, S.; Fan, J.; Jin, Y.; Tian, B.; Zheng, X.; Fu, H. Nuclear retention of the lncRNA SNHG1 by doxorubicin attenuates hnRNPC-p53 protein interactions. *EMBO reports* **2017**, *18*, 536–548, doi:10.15252/embr.201643139.



101. Pei, X.; Wang, X.; Li, H. LncRNA SNHG1 regulates the differentiation of Treg cells and affects the immune escape of breast cancer via regulating miR-448/IDO. *Int J. Biol Macromol* **2018**, *118*, 24–30, doi:10.1016/j.ijbiomac.2018.06.033.
102. Li, Z.H.; Yu, N.S.; Deng, Q.; Zhang, Y.; Hu, Y.Y.; Liu, G.; Huang, K. LncRNA SNHG7 Mediates the Chemoresistance and Stemness of Breast Cancer by Sponging miR-34a. *Front. Oncol* **2020**, *10*, 592757, doi:10.3389/fonc.2020.592757.
103. Zhang, H.; Xu, H.B.; Kurban, E.; Luo, H.W. LncRNA SNHG14 promotes hepatocellular carcinoma progression via H3K27 acetylation activated PABPC1 by PTEN signaling. *Cell Death Dis* **2020**, *11*, 646, doi:10.1038/s41419-020-02808-z.
104. Zhang, C.; Jiang, F.; Su, C.; Xie, P.; Xu, L. Upregulation of long noncoding RNA SNHG20 promotes cell growth and metastasis in esophageal squamous cell carcinoma via modulating ATM-JAK-PD-L1 pathway. *J. Cell Biochem* **2019**, doi:10.1002/jcb.28444.
105. Xu, B.; Mei, J.; Ji, W.; Bian, Z.; Jiao, J.; Sun, J.; Shao, J. LncRNA SNHG3, a potential oncogene in human cancers. *Cancer cell international* **2020**, *20*, 536, doi:10.1186/s12935-020-01608-x.
106. Zhou, D.; Xia, Z.; Xie, M.; Gao, Y.; Yu, Q.; He, B. Exosomal long non-coding RNA SOX2 overlapping transcript enhances the resistance to EGFR-TKIs in non-small cell lung cancer cell line H1975. *Human cell* **2021**, doi:10.1007/s13577-021-00572-6.
107. Zhang, S.; Cao, R.; Li, Q.; Yao, M.; Chen, Y.; Zhou, H. Comprehensive analysis of lncRNA-associated competing endogenous RNA network in tongue squamous cell carcinoma. *PeerJ* **2019**, *7*, e6397, doi:10.7717/peerj.6397.
108. Na, H.; Li, X.; Zhang, X.; Xu, Y.; Sun, Y.; Cui, J.; Chen, Z.; Shi, X.; Ren, S.; Zuo, Y. LncRNA STEAP3-AS1 Modulates Cell Cycle Progression via Affecting CDKN1C Expression through STEAP3 in Colon Cancer. *Molecular Therapy - Nucleic Acids* **2020**, *21*, 480–491, doi:https://doi.org/10.1016/j.omtn.2020.06.011.
109. Gu, X.; Li, H.; Sha, L.; Zhao, W. A prognostic model composed of four long noncoding RNAs predicts the overall survival of Asian patients with hepatocellular carcinoma. *Cancer Med.* **2020**, *9*, 5719–5730, doi:10.1002/cam4.3275.
110. Wang, Z.; Ji, X.; Gao, L.; Guo, X.; Lian, W.; Deng, K.; Xing, B. Comprehensive In Silico Analysis of a Novel Serum Exosome-Derived Competitive Endogenous RNA Network for Constructing a Prognostic Model for Glioblastoma. *Front. Oncol* **2021**, *11*, 553594, doi:10.3389/fonc.2021.553594.
111. Cui, D.; Feng, Y.; Shi, K.; Zhang, H.; Qian, R. Long non-coding RNA TRPM2-AS sponges microRNA-138-5p to activate epidermal growth factor receptor and PI3K/AKT signaling in non-small cell lung cancer. *Annals of translational medicine* **2020**, *8*, 1313, doi:10.21037/atm-20-6331.
112. Zhou, Y.; Huang, Y.; Dai, T.; Hua, Z.; Xu, J.; Lin, Y.; Han, L.; Yue, X.; Ho, L.; Lu, J.; et al. LncRNA TTN-AS1 intensifies sorafenib resistance in hepatocellular carcinoma by sponging miR-16-5p and upregulation of cyclin E1. *Biomed. Pharmacother* **2021**, *133*, 111030, doi:10.1016/j.biopha.2020.111030.
113. Da, M.; Zhuang, J.; Zhou, Y.; Qi, Q.; Han, S. Role of long noncoding RNA taurine-upregulated gene 1 in cancers. *Molecular medicine (Cambridge, Mass.)* **2021**, *27*, 51, doi:10.1186/s10020-021-00312-4.
114. Liu, Z.; Wang, Y.; Yuan, S.; Wen, F.; Liu, J.; Zou, L.; Zhang, J. Regulatory role of long non-coding RNA UCA1 in signaling pathways and its clinical applications. *Oncology letters* **2021**, *21*, 404–404, doi:10.3892/ol.2021.12665.
115. Yu, T.; Shan, T.D.; Li, J.Y.; Huang, C.Z.; Wang, S.Y.; Ouyang, H.; Lu, X.J.; Xu, J.H.; Zhong, W.; Chen, Q.K. Knockdown of linc-UFC1 suppresses proliferation and induces apoptosis of colorectal cancer. *Cell death & disease* **2016**, *7*, e2228, doi:10.1038/cddis.2016.124.
116. Zhang, X.; Liang, W.; Liu, J.; Zang, X.; Gu, J.; Pan, L.; Shi, H.; Fu, M.; Huang, Z.; Zhang, Y.; et al. Long non-coding RNA UFC1 promotes gastric cancer progression by regulating miR-498/Lin28b. *Journal of experimental & clinical cancer research* : *CR* **2018**, *37*, 134, doi:10.1186/s13046-018-0803-6.
117. Liu, P.; Sun, Q.Q.; Liu, T.X.; Lu, K.; Zhang, N.; Zhu, Y.; Chen, M. Serum lncRNA-UFC1 as a potential biomarker for diagnosis and prognosis of pancreatic cancer. *International journal of clinical and experimental pathology* **2019**, *12*, 4125–4129.
118. Xie, R.; Wang, M.; Zhou, W.; Wang, D.; Yuan, Y.; Shi, H.; Wu, L. Long Non-Coding RNA (LncRNA) UFC1/miR-34a Contributes to Proliferation and Migration in Breast Cancer. *Med. Sci Monit* **2019**, *25*, 7149–7157, doi:10.12659/MSM.917562.
119. Li, Y.; Zhou, X.; Zhang, Q.; Chen, E.; Sun, Y.; Ye, D.; Wang, O.; Zhang, X.; Lyu, J. Lipase member H is a downstream molecular target of hypoxia inducible factor-1alpha and promotes papillary thyroid carcinoma cell migration in BCPAP and KTC-1 cell lines. *Cancer Manag Res.* **2019**, *11*, 931–941, doi:10.2147/CMAR.S183355.
120. Zang, X.; Gu, J.; Zhang, J.; Shi, H.; Hou, S.; Xu, X.; Chen, Y.; Zhang, Y.; Mao, F.; Qian, H.; et al. Exosome-transmitted lncRNA UFC1 promotes non-small-cell lung cancer progression by EZH2-mediated epigenetic silencing of PTEN expression. *Cell death & disease* **2020**, *11*, 215, doi:10.1038/s41419-020-2409-0.
121. Seiler, J.; Breinig, M.; Caudron-Herger, M.; Polycarpou-Schwarz, M.; Boutros, M.; Diederichs, S. The lncRNA VELUCT strongly regulates viability of lung cancer cells despite its extremely low abundance. *Nucleic Acids Res.* **2017**, *45*, 5458–5469, doi:10.1093/nar/gkx076.
122. Gou, Q.; Gao, L.; Nie, X.; Pu, W.; Zhu, J.; Wang, Y.; Liu, X.; Tan, S.; Zhou, J.K.; Gong, Y.; et al. Long Noncoding RNA AB074169 Inhibits Cell Proliferation via Modulation of KHSRP-Mediated CDKN1a Expression in Papillary Thyroid Carcinoma. *Cancer Res.* **2018**, *78*, 4163–4174, doi:10.1158/0008-5472.can-17-3766.
123. Yang, Y.; Li, H.; Hou, S.; Hu, B.; Liu, J.; Wang, J. The noncoding RNA expression profile and the effect of lncRNA AK126698 on cisplatin resistance in non-small-cell lung cancer cell. *PLoS ONE* **2013**, *8*, e65309, doi:10.1371/journal.pone.0065309.
124. Fu, X.; Li, H.; Liu, C.; Hu, B.; Li, T.; Wang, Y. Long noncoding RNA AK126698 inhibits proliferation and migration of non-small cell lung cancer cells by targeting Frizzled-8 and suppressing Wnt/ $\beta$ -catenin signaling pathway. *OncoTargets and therapy* **2016**, *9*, 3815–3827, doi:10.2147/ott.s100633.

125. Chen, Q.; Liu, X.; Xu, L.; Wang, Y.; Wang, S.; Li, Q.; Huang, Y.; Liu, T. Long non-coding RNA BACE1-AS is a novel target for anisomycin-mediated suppression of ovarian cancer stem cell proliferation and invasion. *Oncol Rep.* **2016**, *35*, 1916–1924, doi:10.3892/or.2016.4571.
126. Zhang, Y.; Feng, J.; Fu, H.; Liu, C.; Yu, Z.; Sun, Y.; She, X.; Li, P.; Zhao, C.; Liu, Y.; et al. Coagulation Factor X Regulated by CASC2c Recruited Macrophages and Induced M2 Polarization in Glioblastoma Multiforme. *Frontiers in immunology* **2018**, *9*, 1557, doi:10.3389/fimmu.2018.01557.
127. Wang, X.; Sun, W.; Shen, W.; Xia, M.; Chen, C.; Xiang, D.; Ning, B.; Cui, X.; Li, H.; Li, X.; et al. Long non-coding RNA DILC regulates liver cancer stem cells via IL-6/STAT3 axis. *Journal of hepatology* **2016**, *64*, 1283–1294, doi:10.1016/j.jhep.2016.01.019.
128. Sharma, S.; Munger, K.; Shenk, T. Expression of the Long Noncoding RNA DINO in Human Papillomavirus-Positive Cervical Cancer Cells Reactivates the Dormant TP53 Tumor Suppressor through ATM/CHK2 Signaling. *mBio* **2020**, *11*, e01190-01120, doi:doi:10.1128/mBio.01190-20.
129. Coe, E.A.; Tan, J.Y.; Shapiro, M.; Louphrasitthiphol, P.; Bassett, A.R.; Marques, A.C.; Goding, C.R.; Vance, K.W. The MITF-SOX10 regulated long non-coding RNA DIRC3 is a melanoma tumour suppressor. *PLoS genetics* **2019**, *15*, e1008501, doi:10.1371/journal.pgen.1008501.
130. Xu, F.; Wu, H.; Xiong, J.; Peng, T. Long Non-coding RNA DLEU2L Targets miR-210-3p to Suppress Gemcitabine Resistance in Pancreatic Cancer Cells via BRCA2 Regulation. *Frontiers in molecular biosciences* **2021**, *8*, 645365, doi:10.3389/fmolb.2021.645365.
131. Saha, S.; Kiran, M.; Kuscü, C.; Chatrath, A.; Wotton, D.; Mayo, M.W.; Dutta, A. Long Noncoding RNA DRAIC Inhibits Prostate Cancer Progression by Interacting with IKK to Inhibit NF- $\kappa$ B Activation. *Cancer research* **2020**, *80*, 950–963, doi:10.1158/0008-5472.can-19-3460.
132. Zhang, Z.; Hu, X.; Kuang, J.; Liao, J.; Yuan, Q. LncRNA DRAIC inhibits proliferation and metastasis of gastric cancer cells through interfering with NFRKB deubiquitination mediated by UCHL5. *Cellular & molecular biology letters* **2020**, *25*, 29, doi:10.1186/s11658-020-00221-0.
133. Li, C.; Feng, S.Y.; Chen, L. SET7/9 promotes H3K4me3 at lncRNA DRAIC promoter to modulate growth and metastasis of glioma. *European review for medical and pharmacological sciences* **2020**, *24*, 12241–12250, doi:10.26355/eurrev\_202012\_24016.
134. Zhang, C.; Wang, Y.; Wang, P.; Jiang, L.; Xiao, X. LncRNA DRAIC promotes apoptosis and inhibits proliferation of colorectal cancer via regulating MiR-223. *Minerva medica* **2021**, doi:10.23736/s0026-4806.21.07605-9.
135. Liu, S.; Zou, B.; Tian, T.; Luo, X.; Mao, B.; Zhang, X.; Lei, H. Overexpression of the lncRNA FER1L4 inhibits paclitaxel tolerance of ovarian cancer cells via the regulation of the MAPK signaling pathway. *J. Cell Biochem* **2018**, doi:10.1002/jcb.28032.
136. Yang, X.; Xie, Z.; Lei, X.; Gan, R. Long non-coding RNA GAS5 in human cancer. *Oncology letters* **2020**, *20*, 2587–2594, doi:10.3892/ol.2020.11809.
137. Hao, Y.; Crenshaw, T.; Moulton, T.; Newcomb, E.; Tycko, B. Tumour-suppressor activity of H19 RNA. *Nature* **1993**, *365*, 764–767, doi:10.1038/365764a0.
138. Yoshimizu, T.; Miroglio, A.; Ripoche, M.-A.; Gabory, A.; Vernucci, M.; Riccio, A.; Colnot, S.; Godard, C.; Terris, B.; Jammes, H.; et al. The  $\text{H19}$  locus acts *in vivo* as a tumor suppressor. *Proceedings of the National Academy of Sciences* **2008**, *105*, 12417, doi:10.1073/pnas.0801540105.
139. Xu, A.; Huang, M.-F.; Zhu, D.; Gingold, J.A.; Bazer, D.A.; Chang, B.; Wang, D.; Lai, C.-C.; Lemischka, I.R.; Zhao, R.; et al. LncRNA H19 Suppresses Osteosarcomagenesis by Regulating snoRNAs and DNA Repair Protein Complexes. *Frontiers in Genetics* **2021**, *11*, doi:10.3389/fgene.2020.611823.
140. Gu, X.; Zheng, Q.; Chu, Q.; Zhu, H. HAND2-AS1: A functional cancer-related long non-coding RNA. *Biomed. Pharmacother* **2021**, *137*, 111317, doi:10.1016/j.biopha.2021.111317.
141. Wang, X.; Li, L.; Zhao, K.; Lin, Q.; Li, H.; Xue, X.; Ge, W.; He, H.; Liu, D.; Xie, H.; et al. A novel LncRNA HITT forms a regulatory loop with HIF-1 $\alpha$  to modulate angiogenesis and tumor growth. *Cell death and differentiation* **2020**, *27*, 1431–1446, doi:10.1038/s41418-019-0449-8.
142. Huang, J.Z.; Chen, M.; Chen, D.; Gao, X.C.; Zhu, S.; Huang, H.; Hu, M.; Zhu, H.; Yan, G.R. A Peptide Encoded by a Putative lncRNA HOXB-AS3 Suppresses Colon Cancer Growth. *Molecular cell* **2017**, *68*, 171–184.e176, doi:10.1016/j.molcel.2017.09.015.
143. Chen, X.; Xie, R.; Gu, P.; Huang, M.; Han, J.; Dong, W.; Xie, W.; Wang, B.; He, W.; Zhong, G.; et al. Long Noncoding RNA LBCS Inhibits Self-Renewal and Chemoresistance of Bladder Cancer Stem Cells through Epigenetic Silencing of SOX2. *Clin. Cancer Res.* **2019**, *25*, 1389–1403, doi:10.1158/1078-0432.ccr-18-1656.
144. Zhang, M.; Gao, F.; Yu, X.; Zhang, Q.; Sun, Z.; He, Y.; Guo, W. LINC00261: A burgeoning long noncoding RNA related to cancer. *Cancer cell international* **2021**, *21*, 274, doi:10.1186/s12935-021-01988-8.
145. Wang, Y.; Wu, S.; Zhu, X.; Zhang, L.; Deng, J.; Li, F.; Guo, B.; Zhang, S.; Wu, R.; Zhang, Z.; et al. LncRNA-encoded polypeptide ASRPS inhibits triple-negative breast cancer angiogenesis. *J. Exp. Med.* **2020**, *217*, doi:10.1084/jem.20190950.
146. Fan, L.; Li, H.; Zhang, Y. LINC00908 negatively regulates microRNA-483-5p to increase TSPYL5 expression and inhibit the development of prostate cancer. *Cancer cell international* **2020**, *20*, 10, doi:10.1186/s12935-019-1073-x.
147. Xiu, D.-H.; Liu, G.-F.; Yu, S.-N.; Li, L.-Y.; Zhao, G.-Q.; Liu, L.; Li, X.-F. Long non-coding RNA LINC00968 attenuates drug resistance of breast cancer cells through inhibiting the Wnt2/ $\beta$ -catenin signaling pathway by regulating WNT2. *Journal of experimental & clinical cancer research : CR* **2019**, *38*, 94–94, doi:10.1186/s13046-019-1100-8.
148. Amirinejad, R.; Rezaei, M.; Shirvani-Farsani, Z. An update on long intergenic noncoding RNA p21: A regulatory molecule with various significant functions in cancer. *Cell & bioscience* **2020**, *10*, 82, doi:10.1186/s13578-020-00445-9.
149. Kwok, Z.H.; Roche, V.; Chew, X.H.; Fadiev, A.; Tay, Y. A non-canonical tumor suppressive role for the long non-coding RNA MALAT1 in colon and breast cancers. *International journal of cancer* **2018**, *143*, 668–678.

150. Tie, W.; Ge, F. MALAT1 Inhibits Proliferation of HPV16-Positive Cervical Cancer by Sponging miR-485-5p to Promote Expression of MAT2A. *DNA and cell biology* **2021**, doi:10.1089/dna.2020.6205.
151. Xu, X.; Li, J.; Sun, X.; Guo, Y.; Chu, D.; Wei, L.; Li, X.; Yang, G.; Liu, X.; Yao, L.; et al. Tumor suppressor NDRG2 inhibits glycolysis and glutaminolysis in colorectal cancer cells by repressing c-Myc expression. *Oncotarget* **2015**, *6*, 26161–26176, doi:10.18632/oncotarget.4544.
152. Wu, Y.; Yang, L.; Zhao, J.; Li, C.; Nie, J.; Liu, F.; Zhuo, C.; Zheng, Y.; Li, B.; Wang, Z.; et al. Nuclear-enriched abundant transcript 1 as a diagnostic and prognostic biomarker in colorectal cancer. *Molecular Cancer* **2015**, *14*, 191, doi:10.1186/s12943-015-0455-5.
153. Mello, S.S.; Sinow, C.; Raj, N.; Mazur, P.K.; Biegging-Rolett, K.; Broz, D.K.; Imam, J.F.C.; Vogel, H.; Wood, L.D.; Sage, J.; et al. Neat1 is a p53-inducible lincRNA essential for transformation suppression. *Genes Dev.* **2017**, *31*, 1095–1108, doi:10.1101/gad.284661.116.
154. Mello, S.S.; Attardi, L.D. Neat-en-ing up our understanding of p53 pathways in tumor suppression. *Cell cycle (Georgetown, Tex.)* **2018**, *17*, 1527–1535, doi:10.1080/15384101.2018.1464835.
155. Travis, G.; Haddadi, N.; Simpson, A.M.; Marsh, D.J.; McGowan, E.M.; Nassif, N.T. Studying the Oncosuppressive Functions of PTENP1 as a ceRNA. *Methods in molecular biology (Clifton, N.J.)* **2021**, 2324, 165–185, doi:10.1007/978-1-0716-1503-4\_11.
156. Olivero, C.E.; Martínez-Terroba, E.; Zimmer, J.; Liao, C.; Tesfaye, E.; Hooshdaran, N.; Schofield, J.A.; Bendor, J.; Fang, D.; Simon, M.D.; et al. p53 Activates the Long Noncoding RNA Pvt1b to Inhibit Myc and Suppress Tumorigenesis. *Molecular cell* **2020**, *77*, 761–774.e768, doi:10.1016/j.molcel.2019.12.014.
157. Wang, Y.Q.; Jiang, D.M.; Hu, S.S.; Zhao, L.; Wang, L.; Yang, M.H.; Ai, M.L.; Jiang, H.J.; Han, Y.; Ding, Y.Q.; et al. SATB2-AS1 Suppresses Colorectal Carcinoma Aggressiveness by Inhibiting SATB2-Dependent Snail Transcription and Epithelial-Mesenchymal Transition. *Cancer Res.* **2019**, *79*, 3542–3556, doi:10.1158/0008-5472.can-18-2900.
158. Xu, M.; Xu, X.; Pan, B.; Chen, X.; Lin, K.; Zeng, K.; Liu, X.; Xu, T.; Sun, L.; Qin, J.; et al. LncRNA SATB2-AS1 inhibits tumor metastasis and affects the tumor immune cell microenvironment in colorectal cancer by regulating SATB2. *Mol. Cancer* **2019**, *18*, 135, doi:10.1186/s12943-019-1063-6.
159. Vitelli, V.; Falvo, P.; S, G.N.; Santagostino, M.; Khoraiuli, L.; Pellanda, P.; Bertino, G.; Occhini, A.; Benazzo, M.; Morbini, P.; et al. Telomeric Repeat-Containing RNAs (TERRA) Decrease in Squamous Cell Carcinoma of the Head and Neck Is Associated with Worsened Clinical Outcome. *Int J. Mol. Sci* **2018**, *19*, doi:10.3390/ijms19010274.
